# Supplementary material for: Prophylactic treatment of curcumin in a rat model of depression by attenuating hippocampal synaptic loss
Source: Royal Society of Chemistry journal article supplement (doi:10.1039/d1fo02676c), 2021-01-01
Supplement: d1fo02676c1.xlsx [file d1fo02676c1.xlsx]

## Sheet: Figure 1
Figure 1A
Control	LPS	LPS+Cur
87	50	88
87	77	71
76	65	79
85	53	83
77	48	94
93	56	66
91	70	79
65	57	44
89	74	87
70	49	91
85	83	55
78	61	85
84	23	92
81	59	87
33	84	69
57	46	60
68	38	73
90	57	80
Figure 1B
Control	LPS	LPS+Cur
50	105	39
62	136	46
80	160	50
113	100	105
12	146	75
92	178	57
85	128	96
69	168	60
44	177	133
55	55	104
123	75	74
81	60	60
57	175	69
38	86	15
62	175	79
86	158	81
105	47	105
33	80	86
Figure 1C
Control	LPS	LPS+Cur
83	78	78
76	67	65
65	66	74
67	54	87
75	47	81
83	62	57
57	82	69
79	57	79
70	60	74
82	78	83
59	61	82
75	59	74
69	68	82
85	73	79
69	75	63
63	83	59
87	68	62
74	58	72
Figure 1D
Control	LPS	LPS+Cur
1.303	0.665713	1.00761
1.03933	0.718704	0.915598
0.859986	0.607815	0.924789
1.12057	0.648583	0.679271
0.891774	0.754793	1.06576
0.78533	0.519508	0.850039
Figure 1E
Control	LPS	LPS+Cur
1.0401	0.822503	0.95594
1.22895	0.791155	0.926388
0.841657	0.796886	0.923709
0.949513	0.716001	0.829962
1.0007	0.82984	0.870489
0.939081	0.748013	1.08538
Figure 1F
Control	LPS	LPS+Cur
1.18131	0.758195	0.94837
1.10226	0.780622	0.89069
0.86683	0.75526	0.947503
1.04914	0.748845	0.900397
0.833833	0.707272	1.26446
0.966628	0.849542	0.815477
Figure 1G
Control	LPS	LPS+Cur
1.4187	1.97397	0.819165
1.22961	1.63367	0.897705
0.868374	1.86933	1.25722
0.843746	1.54246	0.832328
0.896865	1.44083	1.51431
0.742707	1.15857	1.19296
Figure 1H
Control	LPS	LPS+Cur
0.957798	1.75016	0.873374
1.11354	1.80923	0.985942
1.10226	1.61044	0.86554
0.856939	1.34343	0.956465
0.910203	1.22857	1.23794
1.05925	1.28152	1.22235
Figure 1I
Control	LPS	LPS+Cur
1.12712	0.677162	0.783956
1.09629	0.762954	0.948837
0.835342	0.781721	1.1021
1.07663	0.783956	0.980563
1.01273	0.888068	1.01631
0.851874	0.699504	0.879131
Figure 1J
Nrf2
Control	LPS	LPS+Cur
1.19804	0.849942	1.04446
1.07685	0.66091	1.0036
1.08472	0.698818	1.34322
0.875544	0.777472	0.815064
0.83346	0.791149	1.08472
0.931375	0.786099	0.891924
HO-1
Control	LPS	LPS+Cur
1.08769	0.835867	0.931825
1.00868	0.7458	0.847514
1.20369	0.508346	0.805507
0.860009	0.669137	1.06087
0.93527	0.766202	0.951277
0.904667	0.670833	0.968468
Figure 1K
Control	LPS	LPS+Cur
1.0417	0.996112	1.06781
0.731711	1.20675	0.935302
1.324	1.76972	0.806591
0.811053	1.43786	0.703989
0.995361	1.5613	1.00364
1.09617	1.16101	1.22674
Figure 1L
Control	LPS	LPS+Cur
0.942842	1.42805	1.03699
1.05627	1.43554	0.883626
1.05742	1.40799	1.01378
1.06966	1.16853	1.32449
1.03878	1.2717	1.10226
0.835038	1.00217	0.82796

## Sheet: Figure 2
Figure 2A
CD45
Control	LPS	LPS+Cur
1.3115	1.88951	1.03034
1.04951	1.35041	1.12888
0.901502	1.39064	0.870599
0.934495	1.43481	1.16845
0.972822	1.74343	1.2197
0.830169	1.69048	1.26639
CD11b
Control	LPS	LPS+Cur
1.11049	1.55437	0.929136
0.929136	1.29648	1.47726
0.943146	1.73738	1.13395
1.13395	1.90265	1.11049
1.11049	1.60305	1.11726
0.772794	1.20687	0.838263
Figure 2C
IL-B
Control	LPS	LPS+Cur
1.12446	1.08695	0.948471
0.77959	1.52427	0.717092
0.981537	1.85486	0.643905
0.737906	1.50339	0.940531
1.1362	1.85263	1.12446
1.2403	1.3096	1.31183
INF-a
Control	LPS	LPS+Cur
0.858845	1.46229	0.935177
1.24093	1.64209	1.05368
1.0614	1.78559	1.11818
0.718521	1.5843	0.801001
1.12315	1.84956	0.916031
0.997162	0.916031	1.5959
TNF-a
Control	LPS	LPS+Cur
0.948017	1.6869	1.20501
1.11285	1.18615	1.13055
1.16995	1.798	1.31768
0.798142	1.41454	1.20473
1.13788	1.87694	0.657821
0.833163	1.5077	0.881721
Figure 2D
Control	LPS	LPS+Cur
0.983597	1.22208	0.835174
1.00555	1.15754	1.09475
1.05502	1.38399	1.21207
0.879366	1.63256	1.00555
0.981715	1.31685	0.923968
1.09475	1.17064	1.10402

## Sheet: Figure 3
Figure 3A
Control	LPS	LPS+Cur
0.968182	1.68828	1.17912
0.827736	1.40267	0.970725
1.09747	1.0628	1.22439
0.930906	1.15815	1.04417
1.14439	1.29148	0.813864
1.03132	1.28013	1.0693
Figure 3B
Control	LPS	LPS+Cur
8.69565	16.6667	11.7647
7.69231	30.7692	11.5385
16.6667	21.4286	18.75
10	17.6471	13.3333
12.5	26.6667	7.14286
14.2857	13.3333	6.66667
Figure 3C
Caspase3
Control	LPS	LPS+Cur
0.979488	1.55569	1.17406
1.10556	1.16074	0.907896
1.02005	1.39	1.01743
1.1856	0.952482	1.11501
0.877135	1.17504	1.00757
0.832167	1.68872	0.920072
Bax
Control	LPS	LPS+Cur
0.999675	1.53031	1.31915
1.10886	1.45907	1.201
0.842326	1.34037	0.758726
1.06042	1.34723	1.14384
1.13464	1.13625	1.16904
0.854088	1.50717	0.932879
Figure 3D
PARP
Control	LPS	LPS+Cur
0.82837	1.69852	0.976329
0.832763	1.04308	0.81458
1.01765	1.54706	0.745102
0.772787	1.7946	1.31489
1.38253	1.39595	1.19141
1.16589	1.71611	0.90665
BCL-2
Control	LPS	LPS+Cur
1.10372	0.914065	1.00528
1.00494	0.951594	1.0797
1.00528	0.7856	0.870612
0.970491	0.835842	0.884861
0.983328	0.811527	0.983328
0.932243	0.879346	1.06393
BAK
Control	LPS	LPS+Cur
0.891371	1.3737	0.816107
1.06074	0.99658	0.886464
1.10227	1.50866	0.984546
1.10337	1.15712	1.18428
0.951603	1.46455	0.918436
0.890636	1.18989	0.834539

## Sheet: Figure 4
Figure 4A
Control	LPS	LPS+Cur
0.435797	0.167614	0.402274
0.435797	0.134091	0.301706
0.368751	0.23466	0.23466
0.268183	0.100569	0.301706
0.402274	0.301706	0.335228
0.268183	0.268183	0.368751
Figure 4B
Control	LPS	LPS+Cur
9.2711	3.89725	8.22876
8.74508	6.639	9.04432
11.8796	4.27808	10.1706
12.3544	5.83942	9.18599
7.74693	7.6419	8.3501
8.14028	6.55579	7.81963
Figure 4C
Syn
Control	LPS	LPS+Cur
1.09421	0.808902	1.11864
0.894723	0.681418	1.02903
0.903914	0.642954	0.805964
1.09421	0.778959	0.731201
1.04443	0.438104	0.805964
0.968505	0.596424	1.24918
PSD-95
Control	LPS	LPS+Cur
1.06662	0.813314	1.08142
1.19982	0.526247	1.17901
0.881463	0.922553	0.897176
1.0754	0.558	1.01126
0.814893	0.684692	0.991933
0.961808	0.837171	0.837171
Syt1
Control	LPS	LPS+Cur
0.988783	0.685789	0.877698
1.08753	0.817677	0.875409
0.778915	0.729766	1.18882
1.15315	0.72865	0.867065
0.975783	0.789648	0.812407
1.01584	0.616128	1.27727
Nlg1
Control	LPS	LPS+Cur
1.02709	0.767271	1.0148
1.13725	0.885489	1.37258
0.960549	0.693002	0.902231
0.915053	0.890884	1.22544
1.03244	0.812441	1.26487
0.927622	0.798921	0.960549
Figure 4D
mEPSC-HZ
Control	LPS	LPS+Cur
2.25564	1.22137	3.96947
3.35878	0.769231	2.13741
3.20611	1.57978	2.62664
2.44275	2.67558	4.96894
2.30947	2.59542	1.38568
3.7234	1.97183	4.37158
3.09278	1.95695	2.29008
3.97878	0.846154	2.73224
2.4024	1.98473	1.28755
3.00429	2.45902	2.91971
2.8436	3.86266	3.41615
4.27481	3.47222	2.63158
3.86266	0.801201	4.2654
mEPSC-PA
Control	LPS	LPS+Cur
17.1771	13.4275	13.5803
14.3754	10.7423	16.1308
12.8175	13.8347	16.0408
13.3187	18.2428	14.7819
14.4654	15.0554	12.7157
17.3187	12.5427	13.1226
13.9826	13.8636	12.5955
13.0617	11.3353	16.1308
14.9078	10.2233	17.8381
13.504	9.63471	15.2588
17.9156	11.2916	14.0572
12.6819	10.8325	15.3351
15.0031	8.49218	10.1749
Figure 4E
sEPSC-HZ
Control	LPS	LPS+Cur
5.80153	3.41615	3.125
4.18006	3.35878	2.1327
4.51389	4.03727	5.21327
2.91971	3.3033	3.27869
4.6083	2.13741	3.92799
2.44275	2.4024	4.13625
3.52941	2.17391	4.95495
4.51613	1.52672	3.85852
2.92683	1.86335	2.90076
2.45902	2.2508	3.35878
2.89389	1.91257	2.73224
3.81679	1.8018	3.32681
2.12202	1.69014	2.12014
4.46927	2.1021	4.01338
sEPSC-PA
Control	LPS	LPS+Cur
24.7073	17.5985	18.8671
20.2129	15.5204	19.6459
20.461	17.2042	20.6249
22.8153	16.0871	20.0738
23.2033	13.079	23.1228
22.2493	19.5079	12.5357
21.1992	16.4541	28.1196
19.9129	13.6946	23.9562
14.4768	18.8671	23.4286
16.0407	17.3952	20.6249
19.6459	16.7014	20.2331
18.1749	21.3189	16.0026
20.858	16.4541	19.1557
22.2982	15.9707	16.6322
Figure 4F
Control	LPS	LPS+Cur
0.75	0.35	0.6
0.85	0.35	0.55
0.9	0.3	0.75
0.85	0.6	0.85
0.8	0.9	0.6
0.65	0.65	0.9
0.55	0.55	0.75
0.7	0.6	0.7
0.6	0.3	0.85
0.85	0.8	0.75
0.95	0.75	0.7
1	0.4	0.8
Figure 4G
Control	LPS	LPS+Cur
2.7	1.2	1.6875
1.2	1.02857	1.33333
1.8	1.2	1.5
1.5	1.8	1.56522
2.4	2.16	1.35
1.8	1.35	1.31707
2.4	1.575	2.7
2.16	1.8	1.84615
1.44	1.2	1.8
3.6	1.08	2.36842
2.25	1.35	2.34783
1.35	1.2	2.33333
2.4	0.9	2.25
2.16	1.8	2.25
2.4	1.35	1.17391

## Sheet: Figure 5
Figure 5C
Contro-EXO	LPS-EXO	LPS+Cur-EXO
1.0322	1.36265	1.37913
0.90164	1.58749	1.00131
0.665834	1.444	1.467
1.09402	1.21223	1.06837
1.04349	1.48148	1.08183
1.29417	0.972466	0.661207
1.04388	1.56727	1.07389
0.924768	1.2187	0.915224
Figure 5D
Control	LPS	LPS+Cur
1.07928	1.53255	1.45428
1.02924	0.787246	0.892627
1.02599	1.76053	0.82035
1.06739	4.28961	1.53876
1.26615	3.12686	0.86909
0.882797	2.80039	1.00684
0.747868	1.63657	1.07131
0.901279	3.01254	0.729691
Figure 5E
DMEM-EXO	IBA1-EXO	IBA1+LPS-EXO
0	1.15734	1.99751
0	0.687575	1.78679
0	1.28176	1.63384
0	0.864724	1.58364
0	0.415972	1.42074
0	1.44788	1.15418
0	1.24936	1.29009
0	1.20723	2.18608
Figure 5F
Control	LPS	LPS+Cur
0.910965	0.645968	0.949456
1.08182	0.435206	1.09901
1.00016	0.482463	1.05063
0.842334	0.560463	0.72423
1.06504	0.856719	0.937564
1.09968	0.892129	0.751309
Figure 5H
WT/uninjected	WT/AAV-control	WT/AAV-miR-146a-5p
1.03781	1.32811	1.24578
0.814117	0.83809	1.68246
0.852035	0.73206	2.77518
1.10107	0.816474	2.58428
0.920941	0.989524	2.00159
1.27403	0.593254	2.03556
WT/uninjected	CUMS/uninjected	CUMS/AAV-control	CUMS/AAV-miR-146a-5p-inhibitor
0.976322	1.0326	1.08105	0.91003
0.807448	1.47209	1.74756	0.913598
0.621637	1.70002	2.0348	0.57923
0.815119	1.22074	0.981623	0.889753
0.841653	1.68475	1.50461	0.810117
0.945361	2.54621	1.26383	0.919318
Figure 5I
WT/uninjected	WT/AAV-control	WT/AAV-miR-146a-5p
1.07385	1.1832	0.713632
1.03174	0.954913	0.867376
0.984984	0.707619	0.682871
1.1987	1.04426	0.746639
0.914823	0.883518	0.528913
0.795911	0.98258	0.656783
WT/uninjected	CUMS/uninjected	CUMS/AAV-control	CUMS/AAV-miR-146a-5p-spong
0.972344	0.719452	0.724455	0.818242
1.02218	0.914176	0.710311	0.981601
0.836391	0.719927	0.790611	1.41694
1.11493	0.670328	0.64943	0.905507
1.11147	0.587412	0.445791	1.21706
0.942676	0.709668	0.825136	1.05885

## Sheet: Figure S4
S4 C
SPT
WT/uninjected	WT/AAV-control	WT/AAV-miR-146a-5p
78	72	61
69	78	55
57	63	57
79	58	47
88	69	38
54	51	69
65	77	40
79	80	71
90	63	53
82	48	39
73	87	78
66	79	58
54	74	52
75	80	44
S4 D
FST
WT/uninjected	WT/AAV-control	WT/AAV-miR-146a-5p
60	45	158
47	65	181
39	70	175
38	59	126
109	97	115
75	75	59
67	69	73
73	81	129
117	103	135
83	126	88
49	69	38
92	80	80
76	93	126
63	51	67
S4 E
SPT
WT/uninjected	LPS/uninjected	LPS/AAV-control	LPS/AAV-miR-146a-5p-inhibitor
82	32	40	66
75	22	31	47
69	66	38	83
92	59	26	71
85	54	71	87
91	62	56	63
78	70	37	44
81	56	62	50
56	72	46	81
79	42	41	85
85	49	77	72
72	78	62	90
54	30	63	57
57	49	55	70
S4F
FST
WT/uninjected	LPS/uninjected	LPS/AAV-control	LPS/AAV-miR-146a-5p-inhibitor
110	113	123	51
78	85	86	69
42	76	108	46
61	126	79	57
24	176	157	75
50	95	135	84
87	159	120	53
127	115	157	60
49	102	86	87
92	139	140	51
59	88	89	48
71	67	101	63
67	183	91	108
136	99	65	110
