# Supplementary figures and images for: Prophylactic treatment of curcumin in a rat model of depression by attenuating hippocampal synaptic loss
Source: Royal Society of Chemistry journal article supplement (doi:10.1039/d1fo02676c), 2021-01-01

**Figure 2G**

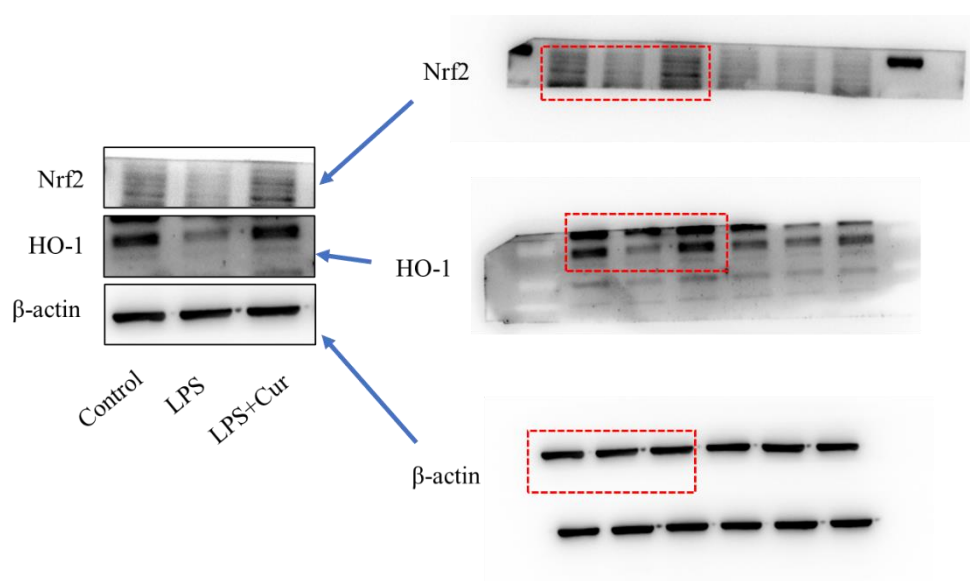

**Figure 3A**

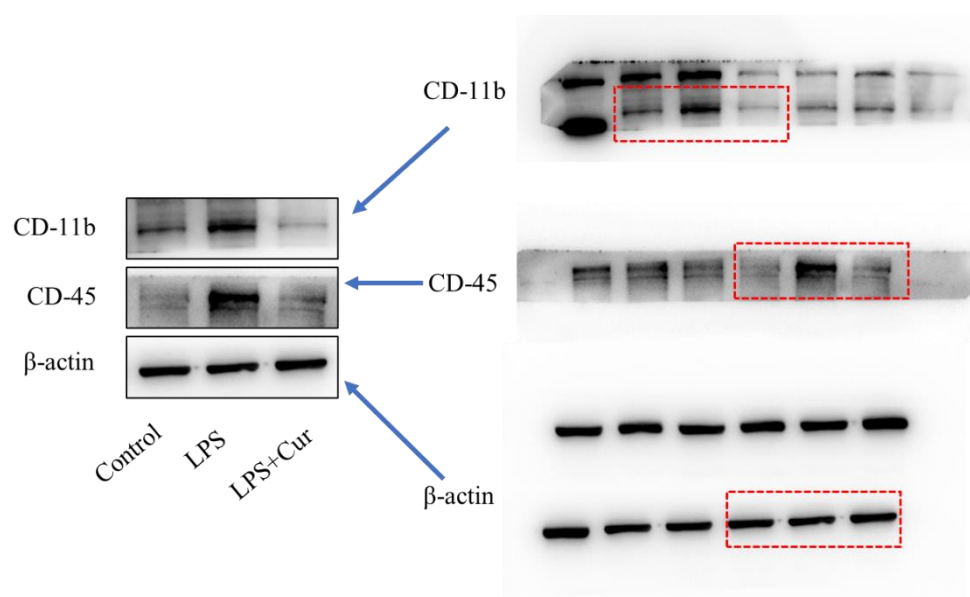

**Figure 3D**

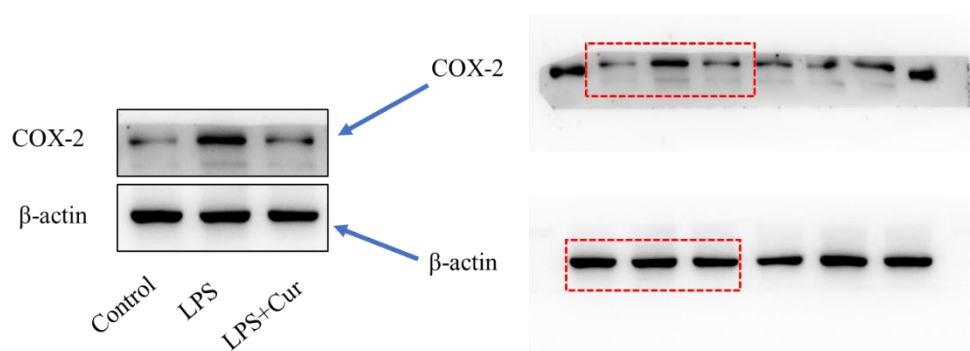

**Figure 4D**

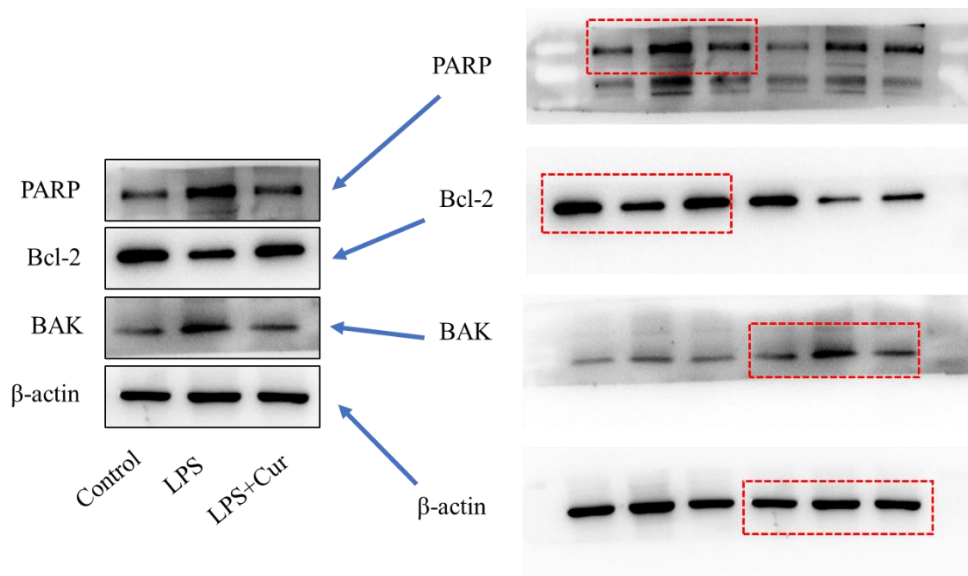

**Figure 5C**

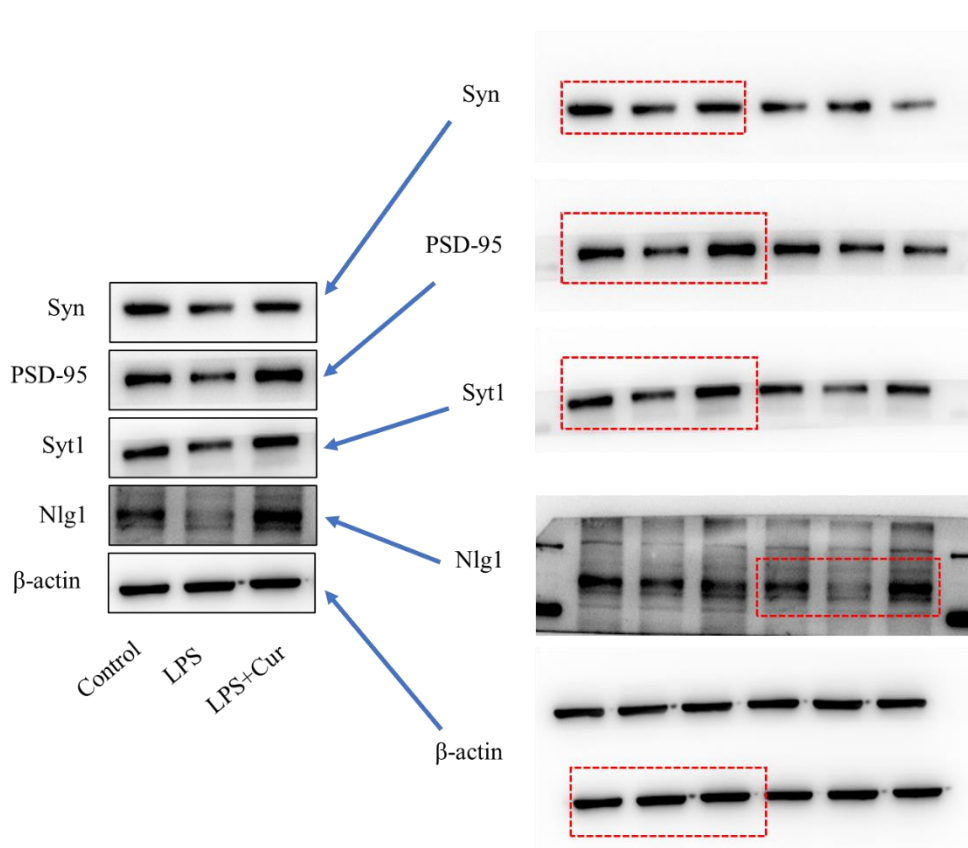

**Figure 7D**

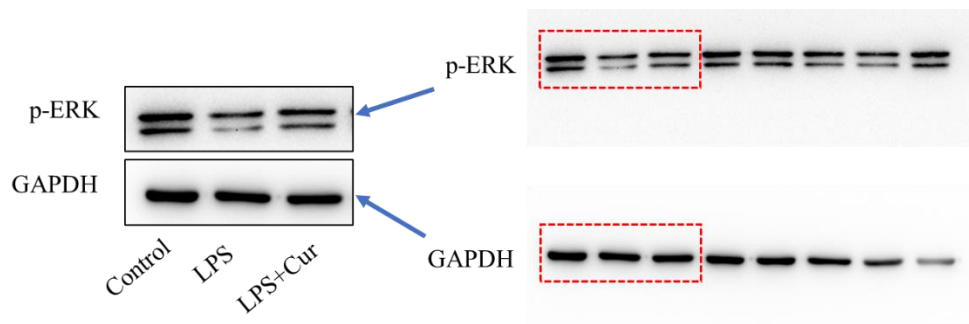

**Figure 7E**

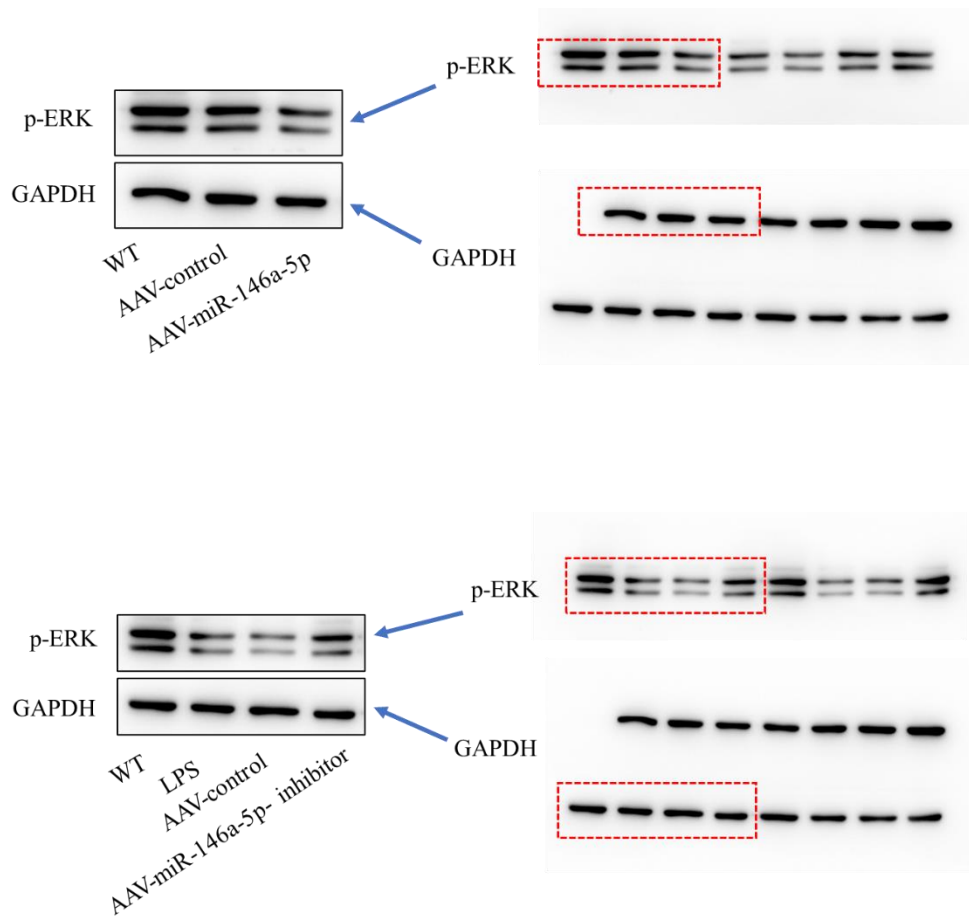

**Figure S2**

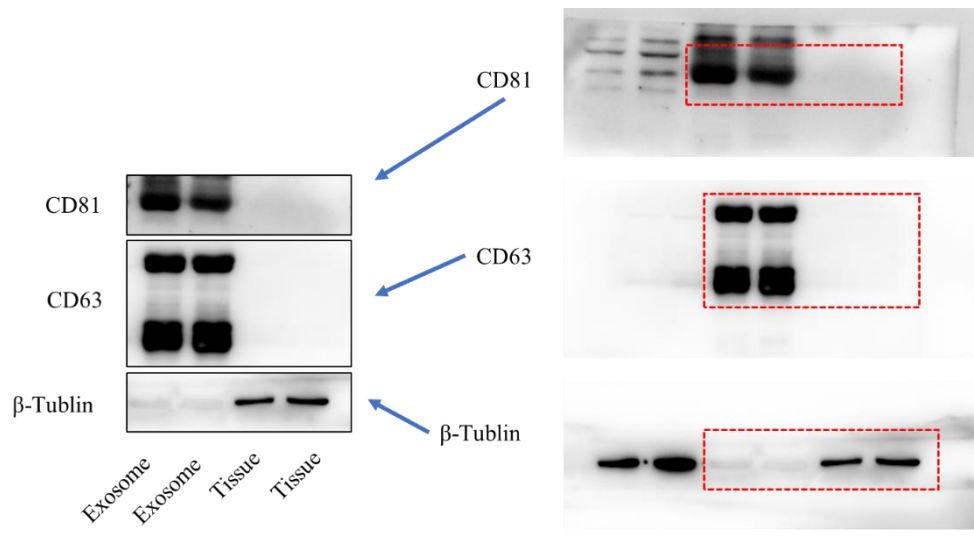

Supplement: d1fo02676c3.pdf [file d1fo02676c3.pdf]
